# Supplementary figures and images for: Development of a novel bio-inspired “cotton-like” collagen aggregate/chitin based biomaterial with a biomimetic 3D microstructure for efficient hemostasis and tissue repair
Source: Royal Society of Chemistry journal article supplement (doi:10.1039/c9tb02028d), 2019-01-01

**Figure 1s** The effect of V-3D-Ag-col and V-3D-Col on the wound healing rates of the rats.

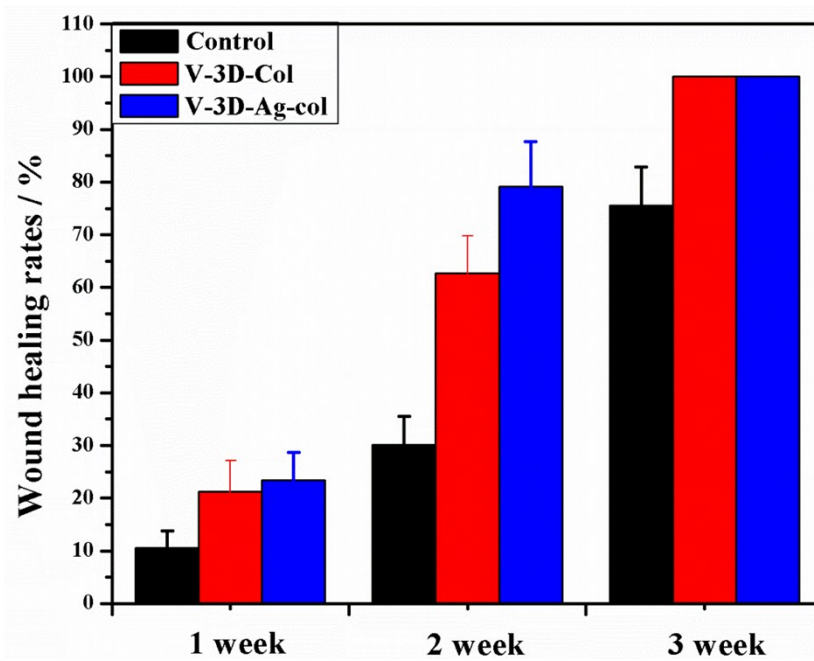

**Figure 2s**

Supplement: c9tb02028d1.pdf [file c9tb02028d1.pdf]
